# Supplementary material for: Phosphorylation of CENP-C by Aurora B facilitates kinetochore attachment error correction in mitosis
Source: PubMed Central journal article supplement — Proc Natl Acad Sci U S A. 2017 Nov 27;114(50):E10667–76. doi: 10.1073/pnas.1710506114 (PMC5740674; doi:10.1073/pnas.1710506114), 2017-11-27
Supplement: pnas.201710506SI.pdf [file pnas.201710506SI.pdf]

# Supporting Information

Zhou et al. 10.1073/pnas.1710506114

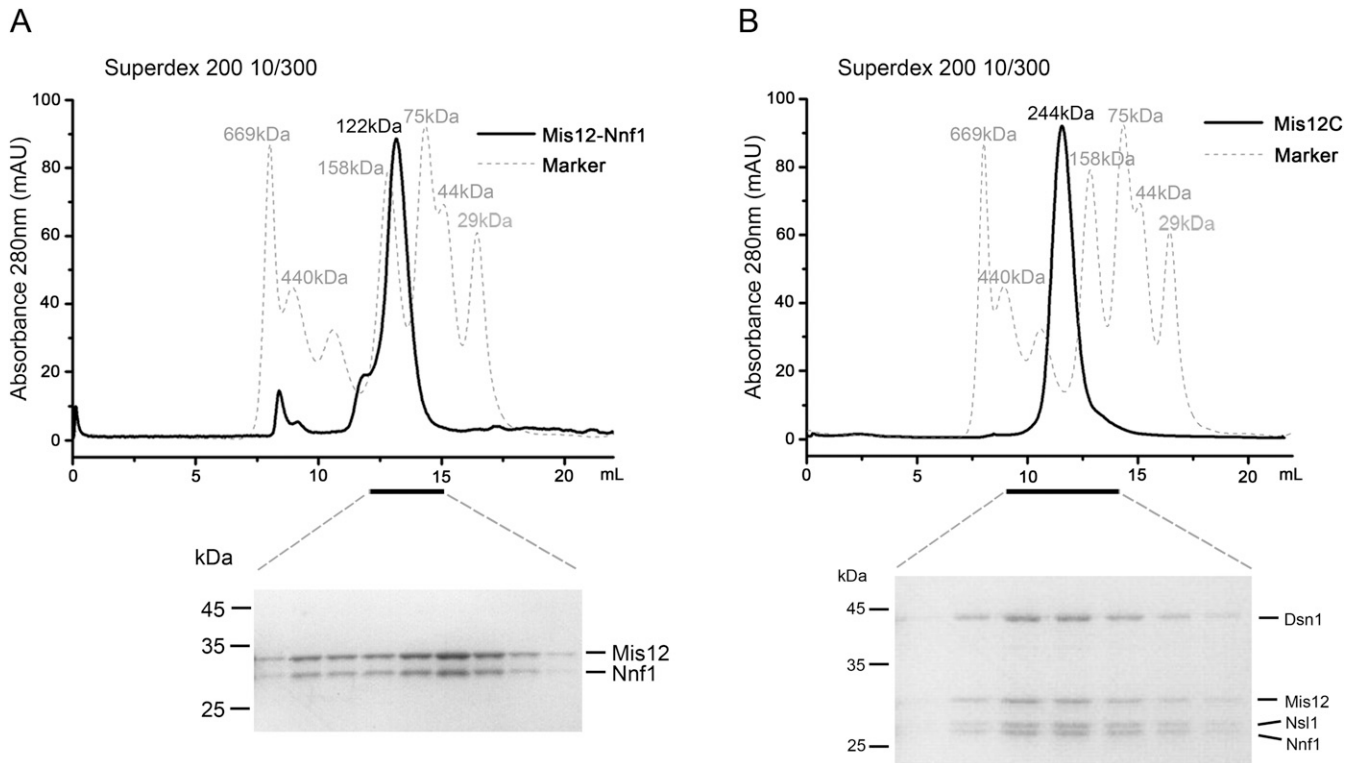

**Fig. S1.** SEC of Mis12-Nnf1 and Mis12C. SEC of the Mis12-Nnf1 subcomplex (A) and Mis12C (B) with corresponding SDS/PAGE analysis stained with Coomassie brilliant blue. The dotted gray lines indicate elution markers of SEC, and their molecular masses are shown.



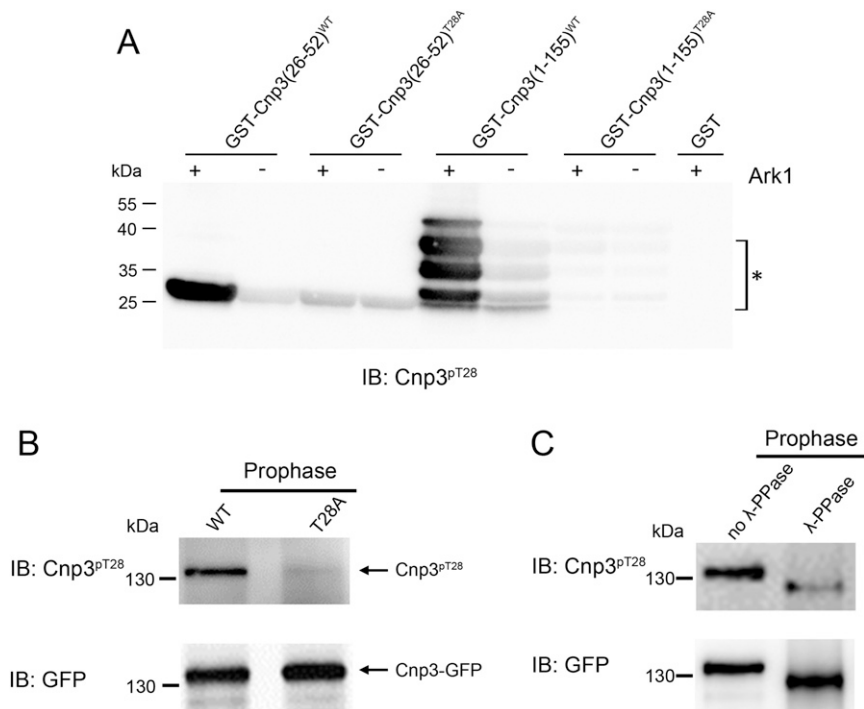

**Fig. S3.** Phosphorylation of Cnp3 at Thr28 is specifically recognized by the generated antibody. (A) Western blot analysis of the site-specific anti-pT28 of Cnp3 antibody in vitro kinase assay. GST-Cnp3(26-52)<sup>WT/T28A</sup> and GST-Cnp3(1-155)<sup>WT/T28A</sup> with or without Ark1 are analyzed. GST tag is used as the negative control. Asterisk indicates the degradation of GST-Cnp3(1-155). (B) In vivo phosphorylation at Thr28 of Cnp3. The indicated *S. pombe* cells carrying *nda3-KM311* and GFP-tagged Cnp3<sup>WT</sup> or Cnp3<sup>T28A</sup> were inoculated at 30 °C and arrested at the mitosis by shifting to the restrictive temperature (16 °C). The cell extracts were analyzed by Western blotting using the GFP antibody and anti-phosphoThr28 antibody. (C) Immunoprecipitated proteins of mitotic-arrested cells were treated with or without λ-PPase and analyzed with the indicated antibodies.

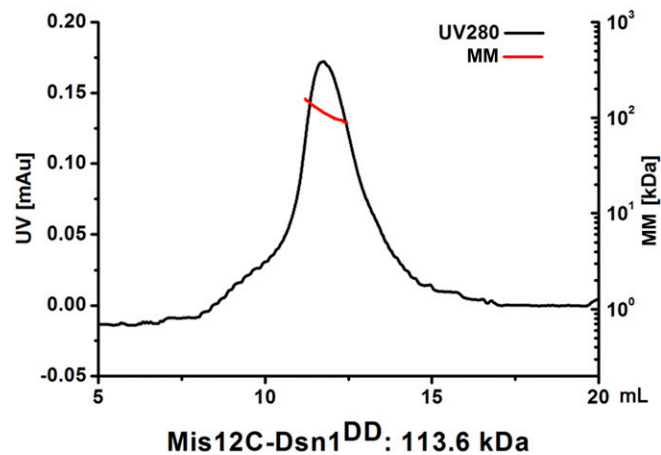

**Fig. S4.** Molecular masses of Mis12C-Dsn1<sup>DD</sup> measured by SEC-MALS. Chromatograms show elution profiles measured in UV280 and calculated molecular mass (MM). The x axis shows elution volume in milliliters.

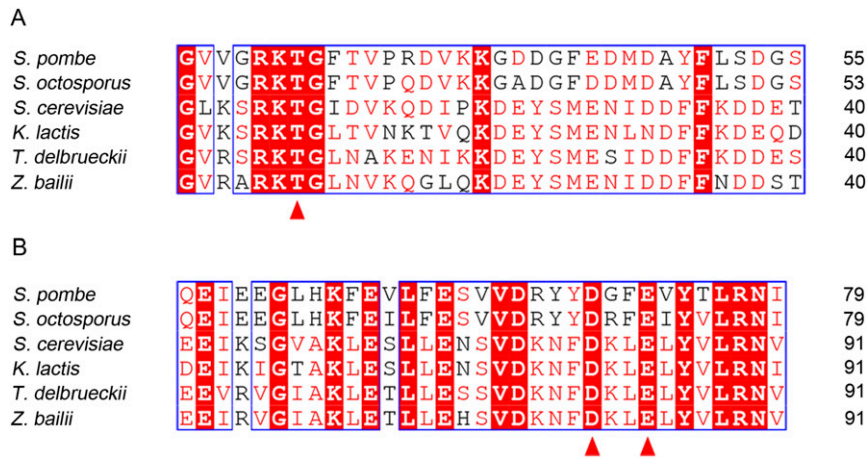

**Fig. 55.** Sequence alignment of the N terminus of CENP-C and Mis12. (A) Sequence alignment of the N terminus in CENP-C from different species. Red triangle indicates the conserved threonine that was phosphorylated by Aurora B. (B) Sequence alignment of the N terminus in Mis12 from different species. Red triangle indicates the conserved negative residues that interact with the N terminus of CENP-C.

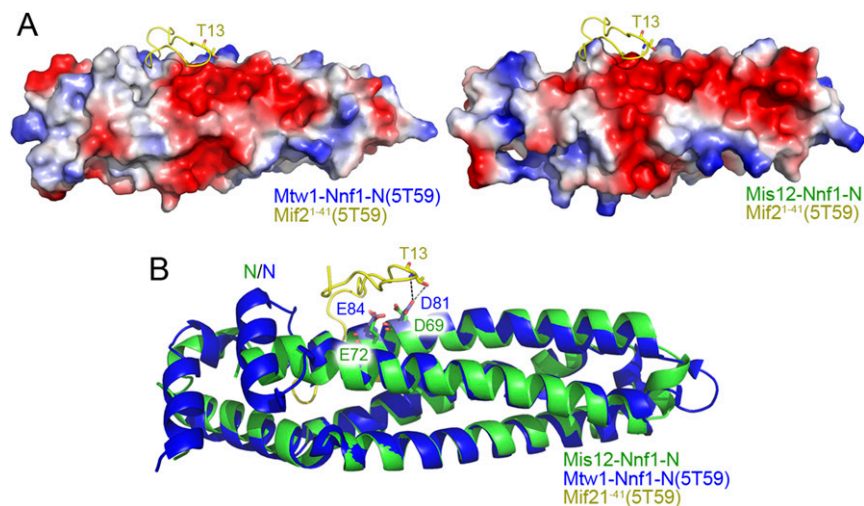

**Fig. 56.** Comparison of the Mis12–Nnf1 subcomplex structures. (A) Surface representation of the N-terminal part of the Mis12–Nnf1 and Mif2<sup>1–41</sup> (PDB ID code 5T59) structure (PDB ID code 5T59, *Left*; our Mis12–Nnf1 subcomplex structure superimposed, *Right*). Surfaces with positive electrostatic potential are blue, while surfaces with negative electrostatic potential are red. (B) Comparison of the N-terminal part of our Mis12–Nnf1 subcomplex structure with the *K. lactis* MN–C2–Mif2<sup>1–41</sup> structure (PDB ID code 5T59); Mis12–Nnf1, Mtw1–Nnf1 (PDB ID code 5T59), and Mif2<sup>1–41</sup> (PDB ID code 5T59) are colored green, blue, and yellow. N indicates the amino terminal, while C indicates the carboxyl terminal.

**Table S1.** Kinetic studies of Ark1 with Dsn1 and Cnp3 peptides as the substrates

| Peptides    | $V_{max}$ , $\mu\text{M}\cdot\text{min}^{-1}$ | $K_m$ , $\mu\text{M}$ | $K_{cat}$ , $\text{s}^{-1}$ | $K_{cat}/K_m$ , $\text{s}^{-1}\cdot\mu\text{M}^{-1}$ |
|-------------|-----------------------------------------------|-----------------------|-----------------------------|------------------------------------------------------|
| Dsn1(66–92) | $0.80 \pm 0.06$                               | $76.31 \pm 20.54$     | 0.0053                      | $7.0 \times 10^{-5}$                                 |
| Cnp3(26–52) | $0.58 \pm 0.05$                               | $277.49 \pm 63.38$    | 0.0038                      | $1.4 \times 10^{-5}$                                 |

**Table S2. Yeast strains used in this study**

| Strain  | Genotype                                                                                                                  | Figure                              | Source                                                                                              |
|---------|---------------------------------------------------------------------------------------------------------------------------|-------------------------------------|-----------------------------------------------------------------------------------------------------|
| CF.3968 | <i>nda3-KM311 ark1-as3::HygR cnp3Δ::NatR ade6-m210? Leu1-32:ase1P*-cnp3-GFP ura4-D18? h?</i>                              | Figs. 3C and 5G and Fig. S3 B and C | This study                                                                                          |
| CF.3969 | <i>nda3-KM311 ark1-as3::HygR cnp3Δ::NatR ade6-m210? Leu1-32:ase1P*-cnp3 (28T→A)-GFP ura4-D18? h?</i>                      | Fig. 3C and Fig. S3B                | This study                                                                                          |
| CF.3768 | <i>cnp3Δ::NatR mis12-FLAG:URA+ Leu1-32:ase1P*-cnp3-GFP lys1-131? h-</i>                                                   | Fig. 4C                             | This study                                                                                          |
| CF.3770 | <i>cnp3Δ::NatR mis12-FLAG:URA+ Leu1-32:ase1P*-cnp3(28T→E)-GFP lys1-131? h-</i>                                            | Fig. 4C                             | This study                                                                                          |
| CF.3696 | <i>cnp3Δ::NatR mis12-GFP-HA:KanR mCherry-atb2::HygR ade6-m210? Leu1-32:ase1P*-cnp3-VC ura4-D18? lys1-131? h90</i>         | Fig. 4 D, F, and I                  | This study                                                                                          |
| CF.3698 | <i>cnp3Δ::NatR mis12-GFP-HA:KanR mCherry-atb2::HygR ade6-m210? Leu1-32:ase1P*-cnp3 (28T→E)-VC ura4-D18? lys1-131? h90</i> | Fig. 4 E, F, and I                  | This study                                                                                          |
| PT.286  | WT <i>ade6-m210 Leu1-32 ura4-D18 h-</i>                                                                                   | Fig. 4 H and I                      | Phong Tran (Department of Cell and Developmental Biology, University of Pennsylvania, Philadelphia) |
| CF.3574 | <i>cnp3Δ::NatR cnp1-GFP::HygR sid4-mTomato: HygR ade6-m210? Leu1-32:ase1P*-cnp3-VC ura4-D18 h-</i>                        | Figs. 4G and 5A                     | This study                                                                                          |
| CF.3576 | <i>cnp3Δ::NatR cnp1-GFP::HygR sid4-mTomato: HygR ade6-m210? Leu1-32:ase1P*-cnp3(28T→E)-VC ura4-D18 h-</i>                 | Figs. 4G and 5B                     | This study                                                                                          |
| CF.3144 | <i>cnp3Δ::KanR ade6-m210 Leu1-32:ase1P*-cnp3-GFP h-</i>                                                                   | Fig. 4H                             | This study                                                                                          |
| CF.3238 | <i>cnp3Δ::KanR ade6-m210 Leu1-32:ase1P*-cnp3(28T→E)-GFP h-</i>                                                            | Fig. 4H                             | This study                                                                                          |
| CF.3529 | <i>cnp3Δ::NatR sid4-GFP::HygR mCherry-atb2: HygR ade6-m210? Leu1-32:ase1P*-cnp3-VC ura4-D18 h-</i>                        | Fig. 5E                             | This study                                                                                          |
| CF.3531 | <i>cnp3Δ::NatR sid4-GFP::HygR mCherry-atb2: HygR ade6-m210? Leu1-32:ase1P*-cnp3(28T→E)-VC ura4-D18 h-</i>                 | Fig. 5E                             | This study                                                                                          |
| CF.3926 | <i>cnp3Δ::KanR bub1-GFP:URA4+ sid4-mTomato: NatR ade6-m210? Leu1-32:ase1P*-cnp3-VC ura4-D18? h?</i>                       | Fig. 5F                             | This study                                                                                          |
| CF.3928 | <i>cnp3Δ::KanR bub1-GFP:URA4+ sid4-mTomato: NatR ade6-m210? Leu1-32:ase1P*-cnp3(28T→E)-VC ura4-D18? h?</i>                | Fig. 5F                             | This study                                                                                          |

**Table S3. Plasmids used in this study**

| Plasmid  | Genotype                             | Source     |
|----------|--------------------------------------|------------|
| pCF.2090 | <i>pJK148-ase1P*-cnp3-GFP</i>        | This study |
| pCF.2134 | <i>pJK148-ase1P*-cnp3(28T→A)-GFP</i> | This study |
| pCF.2135 | <i>pJK148-ase1P*-cnp3(28T→E)-GFP</i> | This study |
| pCF.2143 | <i>pJK148-ase1P*-cnp3-VC</i>         | This study |
| pCF.2145 | <i>pJK148-ase1P*-cnp3(28T→E)-VC</i>  | This study |

**Table S4. Imaging conditions for the strains in this study**

| Figure  | Parameters                                                                                                                                                                      |
|---------|---------------------------------------------------------------------------------------------------------------------------------------------------------------------------------|
| Fig. 4D | Maximum projection live-cell z stack images: 11 optical planes, 0.5 μm step size, 2 min intervals, 5% laser power, 500 ms mCherry exposure, 5% laser power, 500 ms GFP exposure |
| Fig. 4E | Maximum projection live-cell z stack images: 11 optical planes, 0.5 μm step size, 2 min intervals, 5% laser power, 500 ms mCherry exposure, 5% laser power, 500 ms GFP exposure |
| Fig. 5A | Maximum projection z stack images: 21 optical planes, 0.25 μm step size, 1 min intervals, 500 ms mTomato exposure, 500 ms GFP exposure, 3× EM gain                              |
| Fig. 5B | Maximum projection z stack images: 21 optical planes, 0.25 μm step size, 1 min intervals, 500 ms mTomato exposure, 500 ms GFP exposure, 3× EM gain                              |
| Fig. 5E | Maximum projection live-cell z stack images: 11 optical planes, 0.5 μm step size, 30 s intervals, 5% laser power, 500 ms mCherry exposure, 5% laser power, 500 ms GFP exposure  |
| Fig. 5F | Maximum projection live-cell z stack images: 11 optical planes, 0.5 μm step size, 1 min intervals, 5% laser power, 500 ms mCherry exposure, 5% laser power, 500 ms GFP exposure |
